# Supplementary material for: Antibiotics in Wastewater: Baseline of the Influent and Effluent Streams in Kuwait
Source: MDPI journal article supplement (doi:10.3390/toxics10040174), 2022-04-01
Supplement: s1 [file s1]

## Article

# Antibiotics in Wastewater: Baseline of the Influent and Effluent Streams in Kuwait

Bondi Gevao <sup>1</sup>, Saif Uddin <sup>2,\*</sup>, Divya Krishnan <sup>2</sup>, Smitha Rajagopalan <sup>2</sup> and Nazima Habibi <sup>2</sup><sup>1</sup> Environmental Protection Authority, Freetown 47235, Sierra Leone; bondi.gevao@epa.gov.sl<sup>2</sup> Environment and Life Sciences Research Center, Kuwait Institute for Scientific Research, Safat 13109, Kuwait; dkrishnan@kisir.edu.kw (D.K.); srajagopalan@kisir.edu.kw (S.R.); nhabibi@kisir.edu.kw (N.H.)

\* Correspondence: sdin@kisir.edu.kw

## Method Development

During the period covered by this report a new UPLC-MS/MS system (AQUITY UPLC- Xevo TQ-S) has been installed providing improved analytical capabilities due to a 10 times lower instrumental detection limit. The initial draft method has been reviewed and optimized to take full advantage of the new instrumental capabilities. Mixtures of the target compound have been infused and the tune parameters optimized. In tables 1 and 2 we report the experimentally optimized tuning parameters for each of the target compounds (and the respective labeled analogues) under the following common instrumental conditions:

|                              |     |
|------------------------------|-----|
| Capillary Voltage (kV)       | 0.2 |
| Source offset (V)            | 60  |
| Desolvation Temperature (°C) | 400 |
| Desolvation (L/Hr)           | 800 |
| Cone(L/Hr)                   | 150 |
| Nebuliser(Bar)               | 7   |

**Citation:** Gevao, B.; Uddin, S.; Krishnan, D.; Rajagopalan, S.; Habibi, N. Antibiotics in Wastewater: Baseline of the Influent and Effluent Streams in Kuwait. *Toxics* **2022**, *10*, 174. <https://doi.org/10.3390/toxics10040174>

Academic Editor: Roberto Rosal

Received: 10 February 2022

Accepted: 15 March 2022

Published: 1 April 2022

**Publisher's Note:** MDPI stays neutral with regard to jurisdictional claims in published maps and institutional affiliations.

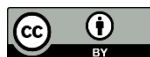

**Copyright:** © 2022 by the authors. Licensee MDPI, Basel, Switzerland. This article is an open access article distributed under the terms and conditions of the Creative Commons Attribution (CC BY) license (<https://creativecommons.org/licenses/by/4.0/>).

**Table S1.** ES+Tuning parameters for the target analytes on the AQUITY UPLC – Xevo TQS System.

| Compound                                         | Detection mode | Center Mass Parent | Cone Voltage | Center mass quantifier | Collision energy | Center mass qualifier | Collision energy |
|--------------------------------------------------|----------------|--------------------|--------------|------------------------|------------------|-----------------------|------------------|
| Acetaminophen                                    | ES+            | 152                | 30           | 93                     | 20               | 110                   | 18               |
| Acetaminophen- <sup>13</sup> C <sub>2</sub>      | ES+            | 155                | 30           | 93                     | 19               | 111                   | 16               |
| Caffeine                                         | ES+            | 194.95             | 20           | 110                    | 25               | 138.15                | 18               |
| Caffeine- <sup>13</sup> C <sub>3</sub>           | ES+            | 198                | 32           | 98                     | 25               | 140.05                | 19               |
| Carbamazepine                                    | ES+            | 237                | 20           | 179                    | 35               | 194.05                | 20               |
| Carbamazepine- d <sub>10</sub>                   | ES+            | 247.05             | 20           | 159                    | 18               | 204.2                 | 35               |
| Erythromycin                                     | ES+            | 734.6              | 30           | 158.15                 | 32               | 576.5                 | 18               |
| Erythromycin- <sup>13</sup> C <sub>2</sub>       | ES+            | 736.5              | 30           | 160.1                  | 30               | 578.4                 | 19               |
| Testosterone                                     | ES+            | 289.1              | 30           | 143                    | 18               | 201.2                 | 17               |
| Testosterone-d <sub>5</sub>                      | ES+            | 293.1              | 30           | 199.1                  | 30               | 228.15                | 30               |
| Sulfamethoxazole                                 | ES+            | 254                | 5            | 92.2                   | 35               | 155.95                | 30               |
| Sulfamethoxazole- <sup>13</sup> C <sub>6</sub>   | ES+            | 259.1              | 15           | 171.1                  | 16               | 241                   | 8                |
| Fluoxetine HCl                                   | ES+            | 310.1              | 20           | 44                     | 8                | 148.05                | 7                |
| Fluoxetine HCl -d <sub>6</sub>                   | ES+            | 316.25             | 5            | 44.05                  | 10               | 154.1                 | 8                |
| Ciprofloxacin-HCl                                | ES+            | 332.2              | 40           | 119.05                 | 25               | 231.1                 | 15               |
| Ciprofloxacin-HCl - <sup>13</sup> C <sub>3</sub> | ES+            | 336.25             | 20           | 235.05                 | 35               | 304.1                 | 20               |
| Progesterone                                     | ES+            | 315.2              | 30           | 97                     | 20               | 109.05                | 20               |
| Progesterone-d <sub>9</sub>                      | ES+            | 323.05             | 25           | 100.2                  | 20               | 113.2                 | 30               |

**Table S2.** ES-Tuning parameters for the target analytes on the AQUITY UPLC – Xevo TQS System.

| Compound                                        | Detection mode | Center Mass Parent | Cone Voltage | Center mass quantifier | Collision energy | Center mass qualifier | Collision energy |
|-------------------------------------------------|----------------|--------------------|--------------|------------------------|------------------|-----------------------|------------------|
| Triclosan                                       | ES-            | 286.9              | 20           | 35                     | 5                | 37                    | 5                |
| Triclosan <sup>13</sup> C <sub>12</sub>         | ES-            | 298.9              | 20           | 35                     | 5                | 37                    | 5                |
| Ibuprofen                                       | ES-            | 204.85             | 20           | 161                    | 10               |                       |                  |
| Ibuprofen- <sup>13</sup> C <sub>3</sub>         | ES-            | 209                | 30           | 164.15                 | 8                |                       |                  |
| Estrone                                         | ES-            | 269.05             | 60           | 145.1                  | 35               | 183.05                | 35               |
| Estrone- <sup>13</sup> C <sub>2</sub>           | ES-            | 271.1              | 30           | 148.1                  | 40               | 185.05                | 35               |
| Estradiol                                       | ES-            | 271.1              | 20           | 145                    | 40               |                       |                  |
| Estradiol- <sup>13</sup> C <sub>2</sub>         | ES-            | 272.9              | 30           | 146.95                 | 40               |                       |                  |
| Ethinyl Estradiol                               | ES-            | 295.1              | 20           | 145.05                 | 38               |                       |                  |
| Ethinyl Estradiol- <sup>13</sup> C <sub>2</sub> | ES-            | 297.1              | 50           | 145.05                 | 38               |                       |                  |
| Diclofenac                                      | ES-            | 293.9              | 20           | 214                    | 20               | 250                   | 12               |
| Diclofenac- d <sub>4</sub>                      | ES-            | 298.91             | 30           | 255                    | 12               |                       |                  |
| Gemfibrozil                                     | ES-            | 249                | 25           | 121                    | 15               | 127                   | 10               |
| Gemfibrozil-d <sub>6</sub>                      | ES-            | 255                | 30           | 121.02                 | 20               |                       |                  |
| Naproxen                                        | ES-            | 229                | 30           | 170                    | 15               | 185.1                 | 10               |
| Naproxen- <sup>13</sup> C                       | ES-            | 233.05             | 30           | 169.05                 | 30               |                       |                  |

Subsequently a set of runs with different gradient settings for both ES+ and ES- detection mode were carried out to optimize the chromatographic separation, peak shape and simplify detection in the chromatographic areas in which was expected potential superposition.

Following are reported the optimized gradient and inlet parameters for each detection mode

## ES-

### Mobile Phases:

A- 5mm ammonium acetate in ultra pure water

B- 10/90 v/v water /acetonitrile with 5mm ammonium acetate

*Gradient:*

| Step | Time (min) | Flow(ml/min) | %A | %B  | %C | %D | Curve |
|------|------------|--------------|----|-----|----|----|-------|
| 1    | 0.0        | 0.4          | 80 | 20  | 0  | 0  |       |
| 2    | 4.5        | 0.4          | 4  | 96  | 0  | 0  | 6     |
| 3    | 5          | 0.4          | 0  | 100 | 0  | 0  | 6     |
| 4    | 6.21       | 0.4          | 80 | 20  | 0  | 0  | 6     |
| 5    | 7.8        | 0.4          | 80 | 20  | 0  | 0  | 6     |

Total run time = 8 minutes.

Seal wash = 1 minute.

## **ES+**

*Mobile Phases:*

A- Ultra pure water with 0.1% formic acid

B- Acetonitrile with 0.1% formic acid

*Gradient:*

| Step | Time (min) | Flow(ml/min) | %A | %B  | %C | %D | Curve |
|------|------------|--------------|----|-----|----|----|-------|
| 1    | 0.0        | 0.4          | 95 | 5   | 0  | 0  |       |
| 2    | 1.5        | 0.4          | 95 | 5   | 0  | 0  | 6     |
| 3    | 3          | 0.4          | 80 | 20  | 0  | 0  | 6     |
| 4    | 4          | 0.4          | 55 | 45  | 0  | 0  | 6     |
| 5    | 6.1        | 0.4          | 35 | 65  | 0  | 0  | 6     |
| 6    | 7          | 0.4          | 0  | 100 | 0  | 0  | 6     |
| 7    | 7.2        | 0.4          | 0  | 100 | 0  | 0  | 6     |
| 8    | 7.45       | 0.4          | 95 | 5   | 0  | 0  | 6     |
| 9    | 8.9        | 0.4          | 95 | 5   | 0  | 0  | 6     |

Total run time = 9 minutes.

Seal wash = 1 minute.

The linear dynamic range of the instrument response was then verified by injecting a set of standards containing the target analytes, and their labeled analogues, at the following increasing concentrations: 10, 20, 40, 50, 60, 80, 100 and 200 ppb (concentration of each component in the mixture). Saturation trend has been observed for some of the target analytes at concentration of 200 ppb resulting in a loss of response linearity. It has been noticed that all the analytes exhibit suitable response linearity ( $R^2 > 0.995$ ) in the calibration range 10 to 100 ppb. In figure 1 is reported one of the target analyte calibration curve with maximum calibration standard at 100 ppb and related correlation coefficient.
